# Supplementary material for: Environmentally Friendly Fertilizers Based on Starch Superabsorbents
Source: PubMed Central journal article supplement (PMC6862305; doi:10.3390/ma12213493), 2019-10-25

Supplementary

# Environmentally Friendly Fertilizers Based on Starch Superabsorbents

Orietta León<sup>1,\*</sup>, Diana Soto<sup>1</sup>, Jesús González<sup>1</sup>, Carlos Piña<sup>1</sup>, Alexandra Muñoz-Bonilla<sup>2,3</sup> and Marta Fernández-García<sup>2,3,\*</sup>

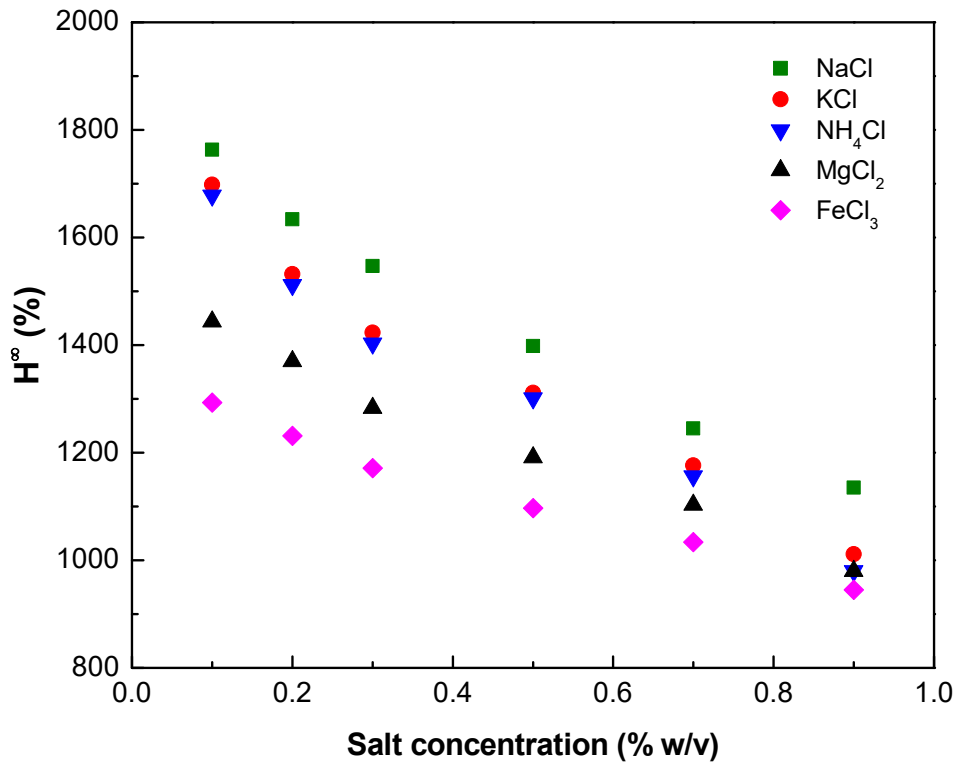

**Figure S1.** Swelling equilibrium of grafted copolymer CCS as a function of salt concentration for different salts.

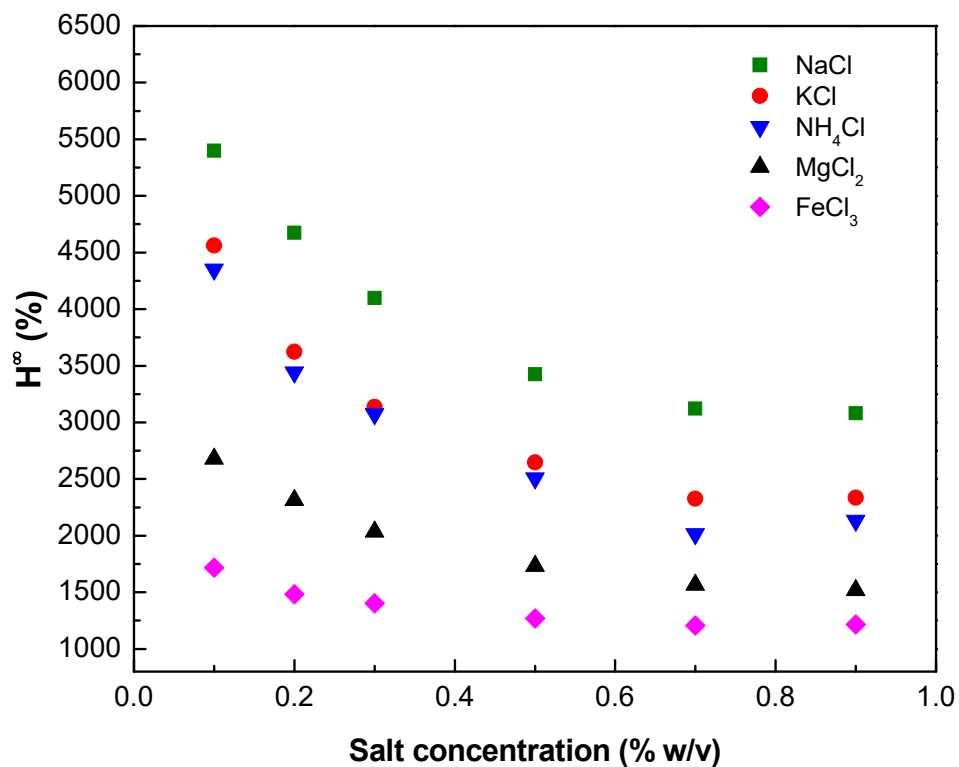

**Figure S2.** Swelling equilibrium of grafted copolymer CMES as a function of salt concentration for different salts.

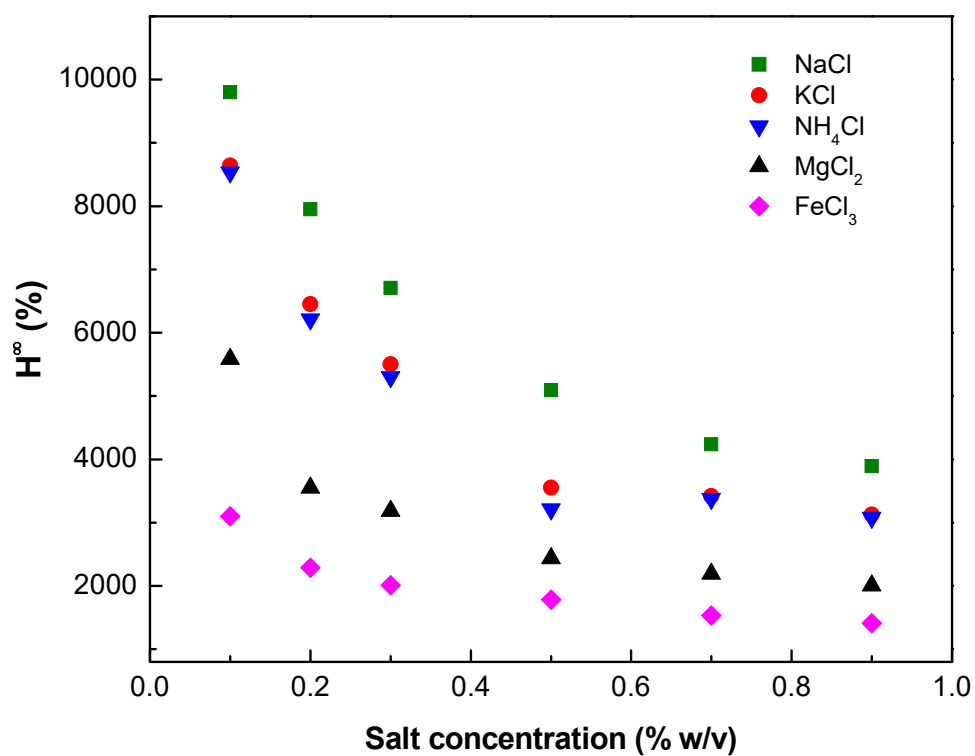

**Figure S3.** Swelling equilibrium of grafted copolymer CMUS as a function of salt concentration for different salts.

**Table S1.** Thermal parameters of native and grafted starch samples.

| Sample | Step                    | Temperature<br>(°C) | T <sub>max</sub><br>(°C) | Weight<br>loss (%) | E <sub>a</sub><br>(KJ/mol) | Ash<br>(%) |
|--------|-------------------------|---------------------|--------------------------|--------------------|----------------------------|------------|
| NCS    | 1. Evaporation          | 50–121              |                          | 5.6                | ND                         | 0.1448     |
|        | 2.1. Decarboxylation    | 245–292             |                          | 4.2                | 89.29                      |            |
|        | 2.2. Main decomposition | 292–434             | 318                      | 77.7               | 231.46                     |            |
|        | 3. Carbonization        | 507–728             |                          | 12.4               | 34.33                      |            |
| NMES   | 1. Evaporation          | 50–121              |                          | 7.2                | ND                         | 0.4184     |
|        | 2.1. Decarboxylation    | 253–298             |                          | 9.9                | 91.20                      |            |
|        | 2.2. Main decomposition | 298–389             | 318                      | 68.3               | 145.50                     |            |
|        | 3. Carbonization        | 546–725             |                          | 14.1               | 28.97                      |            |
| NMUS   | 1. Evaporation          | 50–120              |                          | 6.2                | ND                         | 0.2329     |
|        | 2.1. Decarboxylation    | 235–297             |                          | 10.6               | 110.74                     |            |
|        | 2.2. Main decomposition | 297–411             | 320                      | 69.1               | 145.08                     |            |
|        | 3. Carbonization        | 514–675             |                          | 13.9               | 46.72                      |            |
| CCS    | 1. Evaporation          | 50–229              |                          | 11.0               | ND                         | 0.0210     |
|        | 2.1. Main decomposition | 258–340             | 313                      | 64.4               | 182.99                     |            |
|        | 2.2. PIA decomposition  | 340–441             |                          | 8.4                | 13.67                      |            |
|        | 3. Carbonization        | 558–784             |                          | 12.2               | 31.44                      |            |
| CMES   | 1. Evaporation          | 50–230              |                          | 70.9               | ND                         | 0.1681     |
|        | 2.1. Main decomposition | 254–356             | 320                      | 5.6                | 162.70                     |            |
|        | 2.2. PIA decomposition  | 356–428             |                          | 9.0                | 17.80                      |            |
|        | 3. Carbonization        | 569–800             |                          | 9.1                | 29.68                      |            |
| CMUS   | 1. Evaporation          | 50–235              |                          | 70.6               | ND                         | 0.1386     |
|        | 2.1. Main decomposition | 256–353             | 320                      | 5.7                | 182.91                     |            |
|        | 2.2. PIA decomposition  | 353–427             |                          | 11.2               | 15.19                      |            |
|        | 3. Carbonization        | 569–800             |                          | 70.9               | 54.01                      |            |

ND: No determined; T<sub>max</sub>: Temperature at the maximum

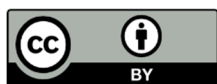

Supplement: materials-12-03493-s001.pdf [file materials-12-03493-s001.pdf]
